# Supplementary material for: Asthma increased in young adults from 2008–2016 despite stable allergic rhinitis and reduced smoking
Source: PLOS journal article supplement (doi:10.1371/journal.pone.0253322), 2021-06-24
Supplement: S1 (10.1371/journal.pone.0253322.s001) [file journal.pone.0253322.s001]

| Symptom                         | Respective questions                                                                                                                                                                                                                                                                                                                                                                                                                |
|---------------------------------|-------------------------------------------------------------------------------------------------------------------------------------------------------------------------------------------------------------------------------------------------------------------------------------------------------------------------------------------------------------------------------------------------------------------------------------|
| Questions regarding asthma<br>, | <p>Have you ever been diagnosed as having asthma by a doctor?</p> <p>Have you now or have you ever had asthma?</p> <p>Do you use asthma medication (on a regular basis or as needed)?</p> <p>Have you had asthma symptoms within the last 12 months?</p> <p>Do you usually have wheezing or whistling in your chest when breathing?</p> <p>Have you had whistling or wheeze in the chest at any occasion in the last 12 months?</p> |
| Current Allergic rhinitis       | Have you had problems with AR during the last 12 months?                                                                                                                                                                                                                                                                                                                                                                            |
| Ever Allergic rhinitis          | Have you now or have you ever had allergic eye or nose problems (hay fever)                                                                                                                                                                                                                                                                                                                                                         |
| Attacks of shortness of breath  | Do you presently have, or have you had in the last 10 years, asthma symptoms and have you had these symptoms within the last 12 months?                                                                                                                                                                                                                                                                                             |
| Long-standing cough             | Have you had longstanding cough during the last year?                                                                                                                                                                                                                                                                                                                                                                               |
| Sputum production               | Do you usually have phlegm when coughing or do you have phlegm in the chest which is difficult to bring up?                                                                                                                                                                                                                                                                                                                         |
| Chronic productive cough        | Sputum production for at least 3 months during two subsequent years?                                                                                                                                                                                                                                                                                                                                                                |
| Wheeze with breathlessness      | Have you had whistling or wheezing in the chest at any occasion during the last 12 months and have you been at all breathless when you had wheezing in the chest?                                                                                                                                                                                                                                                                   |
| Any wheeze                      | Have you had whistling or wheeze in the chest at any occasion in the last 12 months?                                                                                                                                                                                                                                                                                                                                                |
| Recurrent wheeze                | Do you usually have wheezing or whistling in your chest when breathing?                                                                                                                                                                                                                                                                                                                                                             |
| Wheeze without cold             | Have you had whistling or wheezing in the chest at any occasion during the last 12 months and have you had this wheezing or whistling in your chest when you have not had a cold?                                                                                                                                                                                                                                                   |
| Waking with tight chest         | Have you waked up with tightness in the chest at any occasion in the last 12 months?                                                                                                                                                                                                                                                                                                                                                |
| Dyspnoea                        | Do you usually get breathless when you walk on level ground with people your own age?                                                                                                                                                                                                                                                                                                                                               |

| Demographics and covariates                 | Respective questions                                                                                                                          |
|---------------------------------------------|-----------------------------------------------------------------------------------------------------------------------------------------------|
| Family history of asthma or allergy         | 'Have any of your parents or siblings ever had asthma or allergic eye / nose problems (hay fever) or both asthma and hay fever?               |
| Occupational exposure to gas, dust or fumes | Have you been exposed on a large scale to dust, gases or fumes at work?                                                                       |
| Unemployment                                | Not being currently employed or a student                                                                                                     |
| Educational level                           | Which is the highest level of education that you have?' Responders divided into: 'primary / secondary school', 'high school' and 'university' |
| E-cigarette user                            | Do you use e-cigarettes?                                                                                                                      |
| Current snuff use                           | Do you currently use snuff?                                                                                                                   |
| Ever snuff use                              | Have you ever used snuff during at least 6 months?                                                                                            |
| Number of cigarettes/day                    | How many cigarettes do you smoke per day?' Responders divided into: 'less' or 'more than 5 cigarettes per day'                                |
| Current smoking                             | Smoking during the last 12 months                                                                                                             |
| Ex-smoking                                  | Having stopped smoking at least 12 months prior to the survey                                                                                 |
| Growing up on a farm                        | Have your family had a farm during your first 5 years of life                                                                                 |
